# Supplementary material for: Akkermansia muciniphila in the Human Gastrointestinal Tract: When, Where, and How?
Source: MDPI journal article supplement (doi:10.3390/microorganisms6030075), 2018-07-23
Supplement: s1 [file s1]

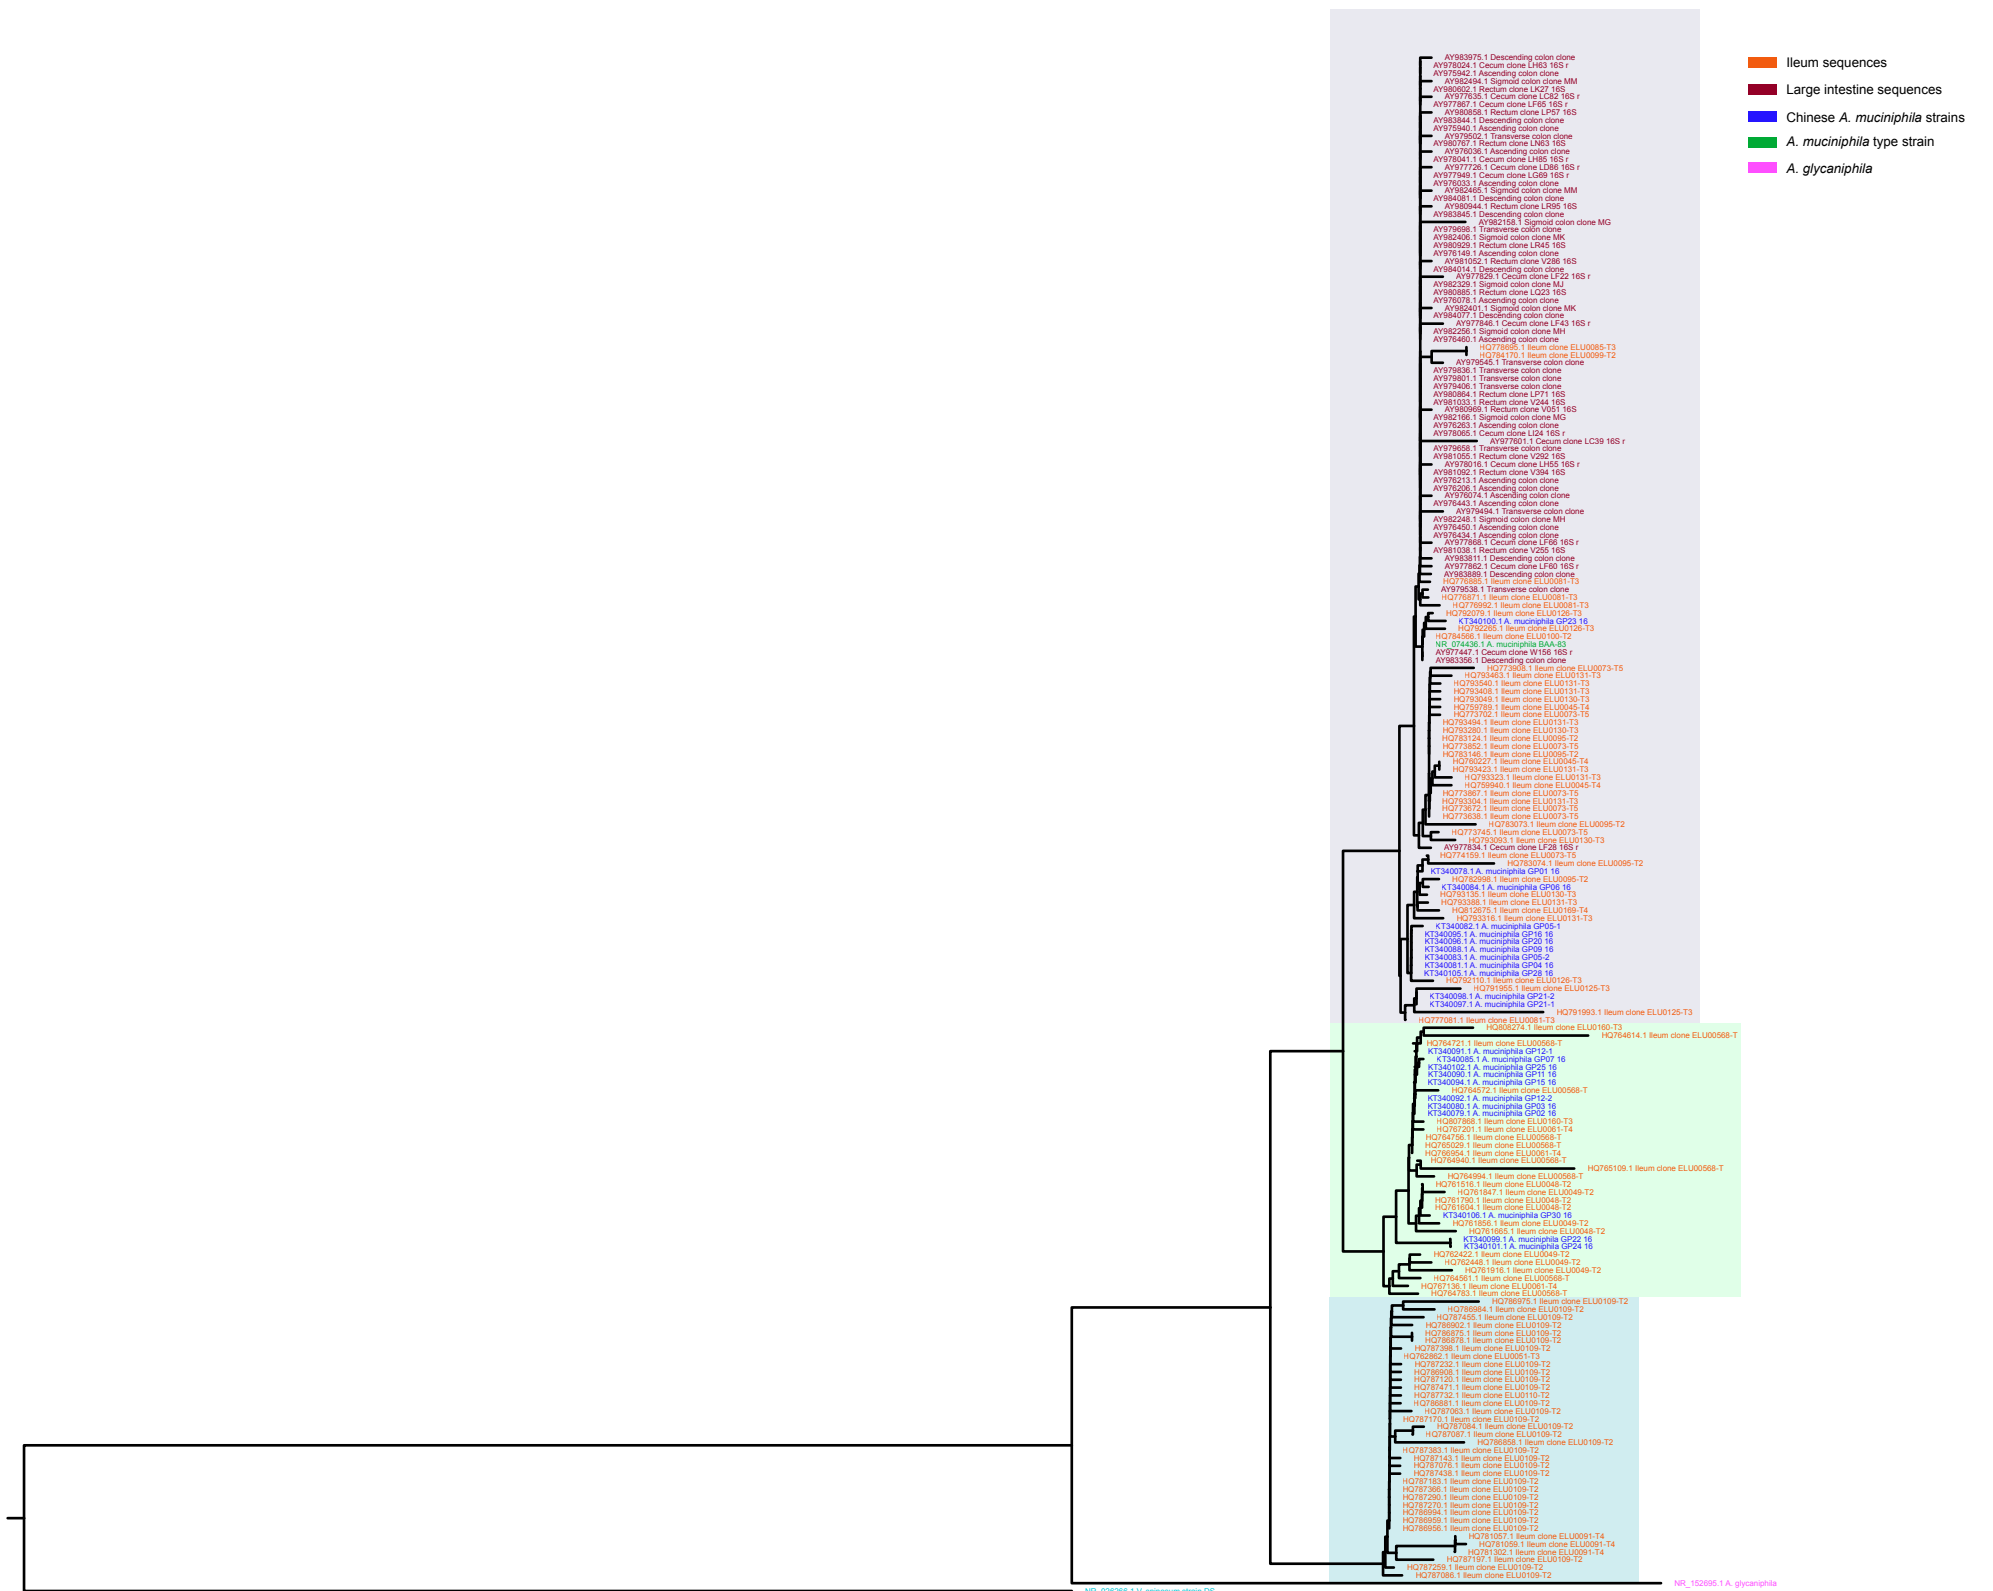

- Ileum sequences
- Large intestine sequences
- Chinese *A. muciniphila* strains
- A. muciniphila* type strain
- A. glycaniphila*

NR\_026266.1 V. eptisicum strain DS

NR\_152895.1 *A. glycaniphila*

0.02
