# Supplementary figures and images for: Akkermansia muciniphila in the Human Gastrointestinal Tract: When, Where, and How?
Source: MDPI journal article supplement (doi:10.3390/microorganisms6030075), 2018-07-23

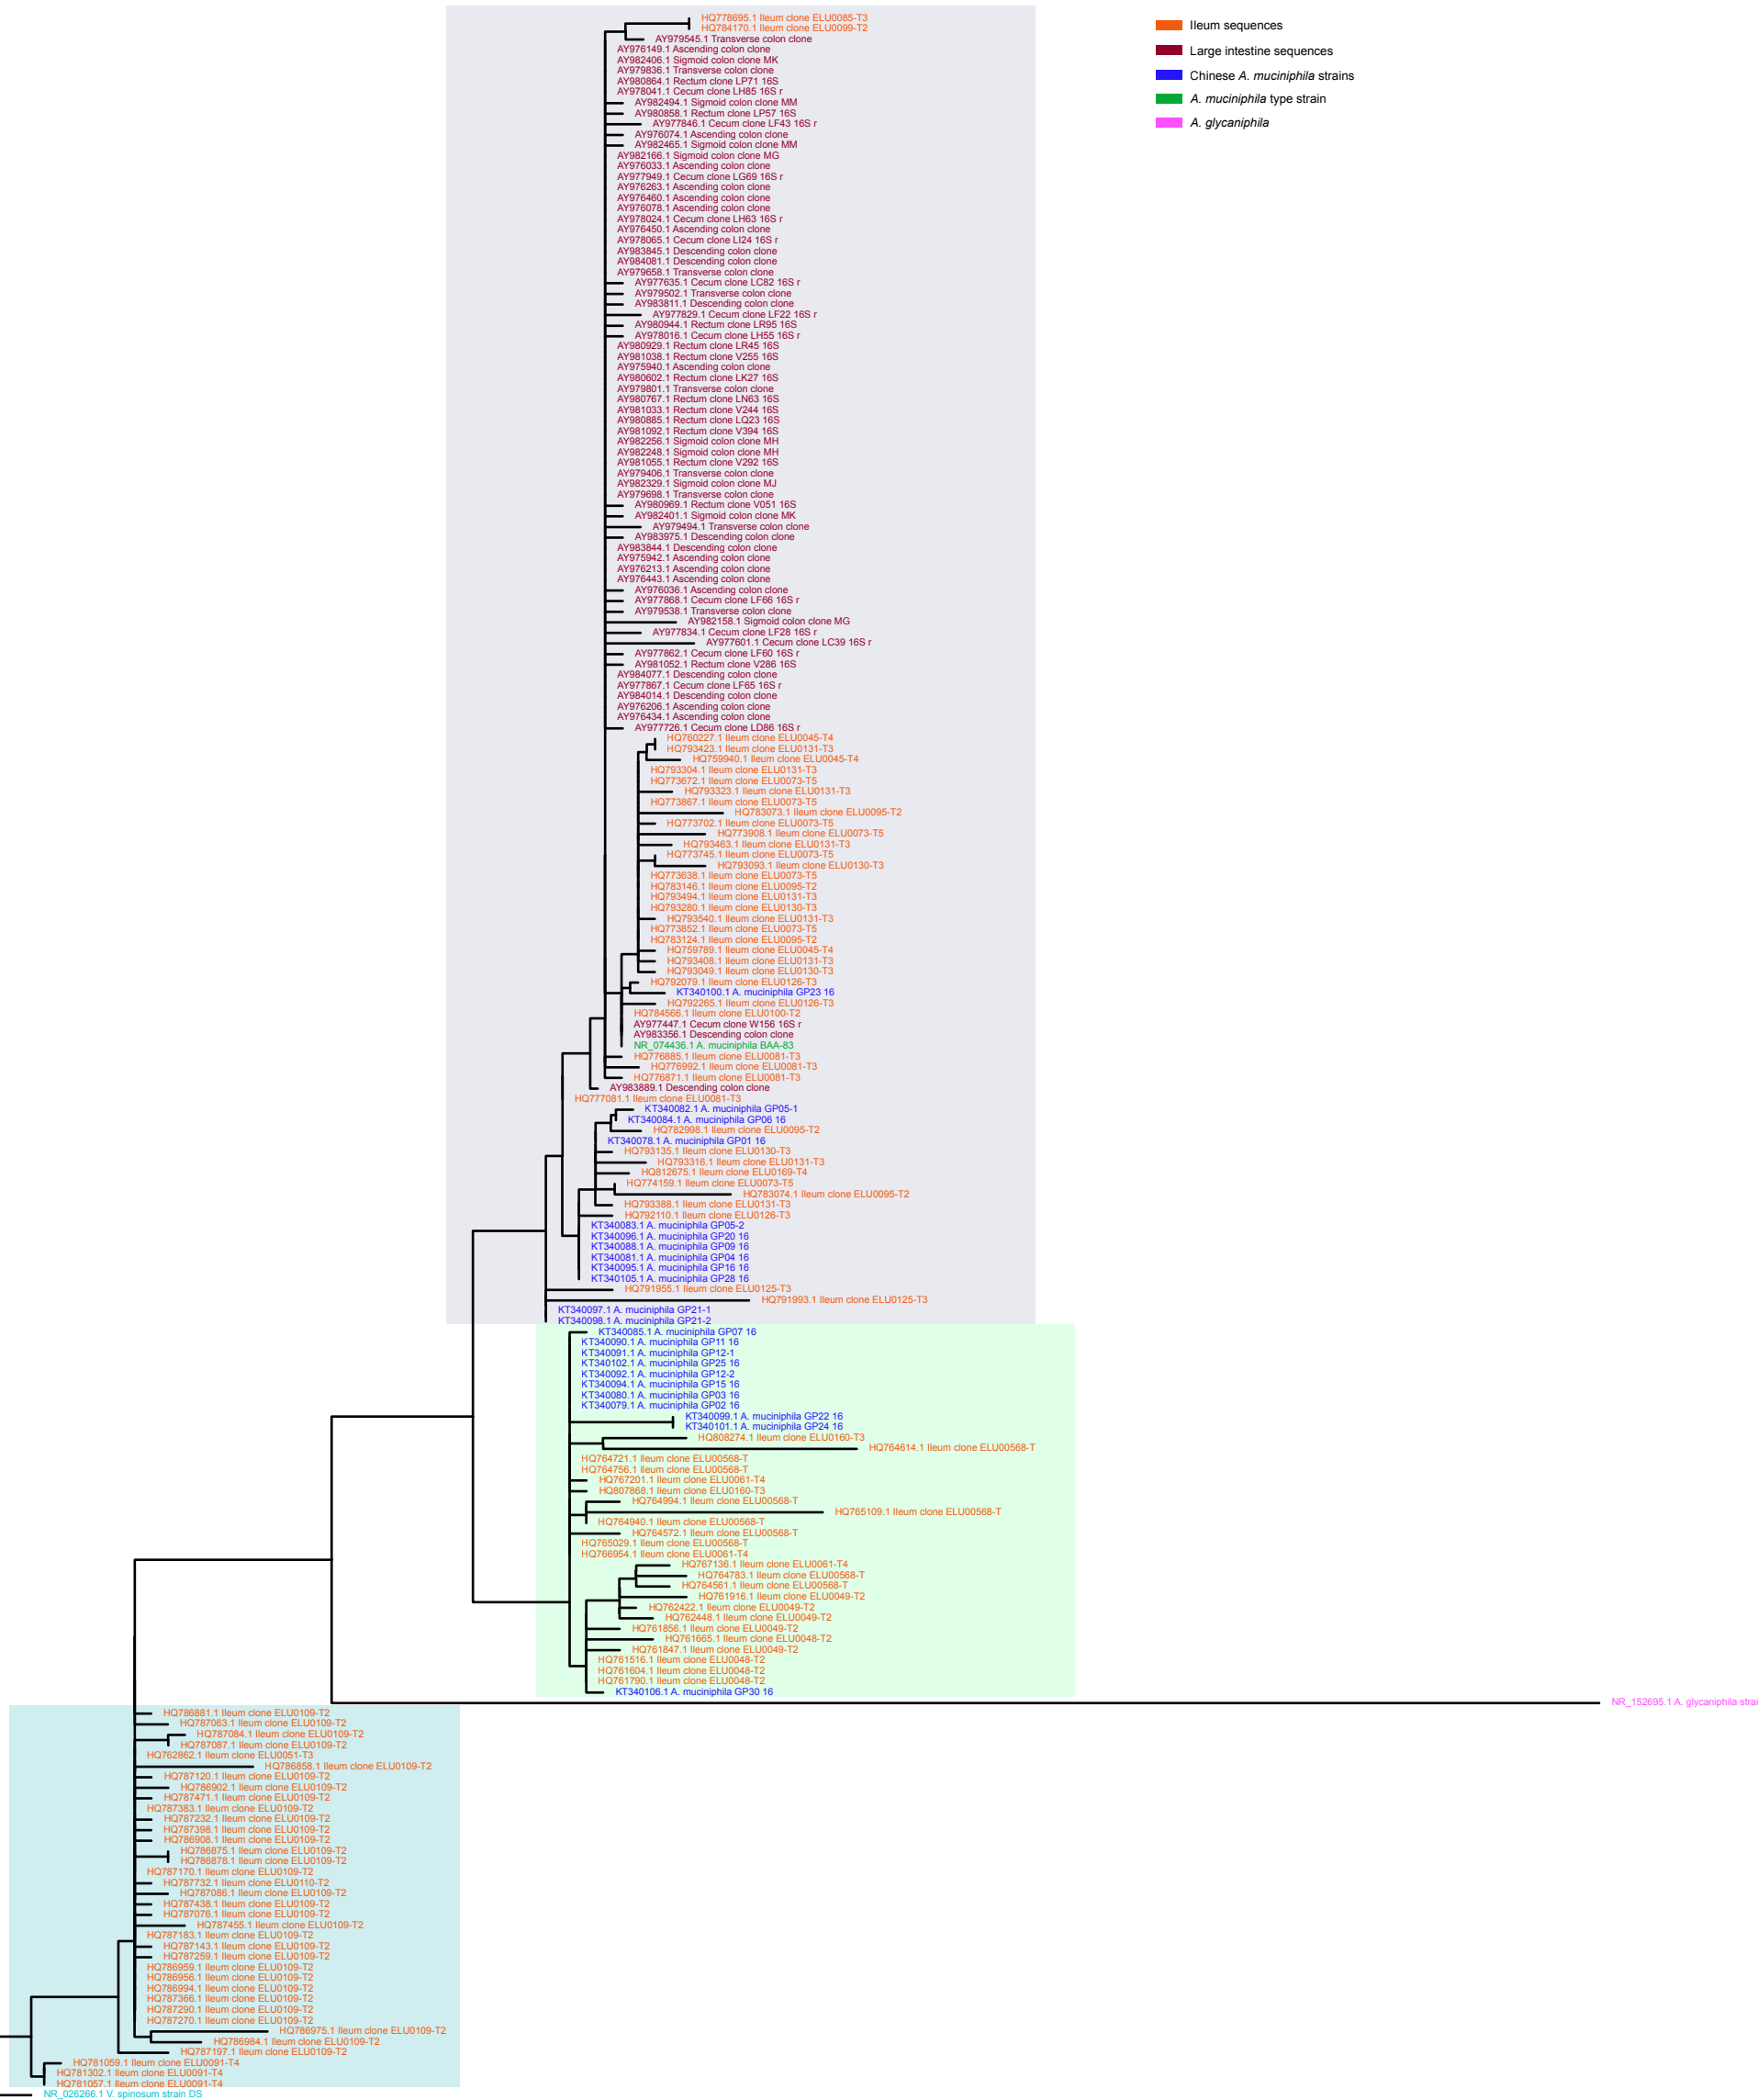

Supplement: s1 [file s1]
